# Supplementary material for: Microtiter plate assays to assess antibiofilm activity against bacteria
Source: Springer Nature journal article supplement (doi:10.1038/s41596-021-00515-3), 2021-04-28
Supplement: MOESM3 [file 41596_2021_515_MOESM3_ESM14.xlsx]

## Sheet: Fig S2
USA 300 LAC - Growth Control - OD600							USA 300 LAC - Growth Control - CV Stain
User 1			User 2				User 1			User 2
BR1	BR2	BR3	BR1	BR2	BR3		BR1	BR2	BR3	BR1	BR2	BR3
0.206	0.204	0.205	0.226	0.226	0.219		1.27	1.186	1.215	1.945	1.839	1.589
0.195	0.209	0.205	0.228	0.234	0.227		1.347	1.563	1.499	1.732	1.754	1.672
0.202	0.204	0.196	0.227	0.223	0.223		1.554	1.399	1.443	1.901	1.759	1.677
0.199	0.203	0.195	0.228	0.222	0.224		1.474	1.502	1.51	2.006	1.784	1.748
0.199	0.208	0.199	0.235	0.23	0.231		1.447	1.519	1.571	1.958	1.571	1.825
0.202	0.211	0.201	0.228	0.224	0.224		1.429	1.281	1.464	2.103	1.861	1.798
USA 300 LAC - Sterility Control - OD600							USA 300 LAC - Sterility Control - CV Stain
User 1			User 2				User 1			User 2
BR1	BR2	BR3	BR1	BR2	BR3		BR1	BR2	BR3	BR1	BR2	BR3
0.124	0.123	0.122	0.127	0.127	0.128		0.157	0.154	0.155	0.188	0.179	0.178
0.123	0.121	0.121	0.122	0.123	0.122		0.154	0.165	0.162	0.178	0.173	0.172
0.123	0.128	0.129	0.131	0.131	0.131		0.161	0.161	0.163	0.208	0.183	0.187
0.122	0.126	0.126	0.127	0.127	0.127		0.152	0.157	0.167	0.179	0.176	0.175
0.122	0.124	0.123	0.127	0.127	0.127		0.155	0.156	0.153	0.181	0.177	0.178
0.121	0.128	0.127	0.129	0.13	0.129		0.162	0.158	0.159	0.181	0.177	0.179
0.127	0.129	0.129	0.129	0.129	0.128		0.162	0.162	0.167	0.184	0.179	0.178
0.121	0.131	0.131	0.132	0.132	0.132		0.154	0.165	0.172	0.205	0.189	0.182
0.122	0.127	0.127	0.127	0.127	0.127		0.177	0.157	0.162	0.189	0.185	0.185
0.121	0.125	0.124	0.128	0.129	0.129		0.161	0.157	0.158	0.192	0.196	0.186
0.119	0.124	0.124	0.127	0.128	0.128		0.151	0.155	0.163	0.2	0.184	0.193
0.127	0.124	0.124	0.129	0.13	0.129		0.155	0.159	0.177	0.193	0.187	0.187
PAO1 - Growth Control - OD600							PAO1 - Growth Control - CV Stain
User 1			User 2				User 1			User 2
BR1	BR2	BR3	BR1	BR2	BR3		BR1	BR2	BR3	BR1	BR2	BR3
1.331	1.262	1.285	1.164	1.149	1.141		2.352	1.596	1.819	2.969	3.146	3.052
1.306	1.227	1.27	1.153	1.012	1.146		2.233	1.524	1.875	2.885	3.121	2.923
1.315	1.239	1.252	1.147	1.108	1.109		2.247	1.557	1.807	3.032	3.074	3.041
1.292	1.222	1.257	1.141	1.104	1.109		2.187	1.587	1.891	3.047	3.063	3.06
1.314	1.244	1.262	1.152	1.125	1.128		2.336	1.526	1.924	3.065	3.007	3.09
1.317	1.25	1.299	1.179	1.171	1.144		2.554	1.533	1.927	2.954	3.056	3.04
PAO1 - Sterility Control - OD600							PAO1 - Sterility Control - CV Stain
User 1			User 2				User 1			User 2
BR1	BR2	BR3	BR1	BR2	BR3		BR1	BR2	BR3	BR1	BR2	BR3
0.119	0.119	0.119	0.122	0.123	0.123		0.159	0.157	0.159	0.183	0.181	0.181
0.118	0.117	0.118	0.118	0.12	0.12		0.154	0.153	0.164	0.172	0.173	0.173
0.119	0.118	0.124	0.126	0.126	0.127		0.177	0.154	0.163	0.18	0.185	0.184
0.117	0.117	0.122	0.123	0.127	0.126		0.155	0.151	0.172	0.179	0.232	0.179
0.117	0.129	0.12	0.123	0.123	0.124		0.154	0.167	0.16	0.177	0.174	0.177
0.117	0.117	0.123	0.125	0.125	0.123		0.157	0.152	0.161	0.184	0.176	0.174
0.123	0.138	0.125	0.125	0.125	0.126		0.161	0.16	0.165	0.195	0.192	0.183
0.118	0.117	0.127	0.129	0.128	0.128		0.156	0.152	0.169	0.196	0.185	0.192
0.118	0.118	0.122	0.123	0.124	0.124		0.158	0.156	0.168	0.188	0.195	0.185
0.118	0.118	0.121	0.124	0.124	0.125		0.155	0.154	0.16	0.222	0.188	0.182
0.116	0.118	0.12	0.123	0.123	0.123		0.153	0.156	0.191	0.21	0.179	0.2
0.118	0.118	0.12	0.125	0.127	0.126		0.166	0.157	0.16	0.197	0.2	0.209

## Sheet: Fig S4
USA300 LAC - Percent bacterial growth based on OD600 readings
	DJK5 - User 1			Vancomycin - User 1			Polymyxin B - User 1			DJK5 - User 2			Vancomycin - User 2			Polymyxin B - User 2
Concentration (ug/ml)	BR1	BR2	BR3	BR1	BR2	BR3	BR1	BR2	BR3	BR1	BR2	BR3	BR1	BR2	BR3	BR1	BR2	BR3
32	-5.99572	2.68595	9.94413	-9.85011	-7.2314	-7.48603	-7.28051	51.0331	-3.46369	*588.6683	2.71647	4.05522	-2.89495	-3.39559	-3.19241	-4.88007	-4.41426	-5.26316
16	-8.56531	-8.47107	-3.46369	-12.4197	-7.2314	-7.48603	-9.85011	43.595	16.648	-1.9024	-0.339559	-0.08628	-8.85029	-6.45161	-9.40466	-5.87262	-5.43294	-6.29853
8	-11.1349	-9.71074	12.6257	-9.85011	-9.71074	-10.1676	*403.8544	55.9917	27.3743	-0.90984	-2.37691	0.949094	-7.85773	-8.48896	-9.40466	-9.84285	-4.41426	-10.44
4	-8.56531	-4.75207	-0.78212	-16.2741	-9.71074	-10.1676	199.572	44.8347	12.6257	-0.90984	-2.37691	0.949094	-7.85773	-8.48896	-9.40466	7.0306	157.555	125.194
2	-8.56531	-3.5124	0.558659	-20.1285	-15.9091	-18.2123	85.2248	3.92562	-14.1899	-5.87262	-7.47029	-4.22778	-21.7535	-21.7317	-22.8645	115.219	70.9677	136.583
1	-2.14133	-5.99174	-4.80447	-16.2741	-10.9504	-11.5084	86.5096	16.3223	13.9665	2.06783	50.5942	37.1872	-17.7833	-17.657	-18.723	121.174	90.3226	49.6117
0.5	58.2441	11.3636	20.6704	-13.7045	-5.99174	-6.14525	81.3705	82.0248	76.9832	80.4797	94.3973	66.1777	-8.85029	-7.47029	-8.36928	66.584	75.0424	78.6022
0.25	113.49	63.4297	126.592	*301.0707	-9.71074	-10.1676	77.5161	78.3058	83.6872	115.219	104.584	122.088	-9.84285	-9.50764	-10.44	92.3904	90.3226	88.956
0.125	128.908	121.694	129.274	90.364	85.7438	102.458	85.2248	80.7851	91.7318	116.212	112.733	130.371	118.197	99.4907	122.088	81.4723	87.2665	92.0621
NB - Wells with * were outliers due to air bubble in well (confirmed visually) and were not included in analysis.
PAO1 - Percent bacterial growth based on OD600 readings
	DJK5 - User 1			Vancomycin - User 1			Polymyxin B - User 1			DJK5 - User 2			Vancomycin - User 2			Polymyxin B - User 2
Concentration (ug/ml)	BR1	BR2	BR3	BR1	BR2	BR3	BR1	BR2	BR3	BR1	BR2	BR3	BR1	BR2	BR3	BR1	BR2	BR3
32	-0.18141	-0.29753	0.36986	4.00502	5.68283	4.199	-0.34887	-0.56531	-0.1523	0.597449	0.650173	0.539017	0.888099	1.05548	0.638527	-0.08074	-0.16043	-0.15756
16	-0.34887	-0.47605	-0.1523	11.5406	34.7813	22.4744	-0.51633	-0.74383	-0.32635	30.1469	0.24487	56.7626	3.11642	2.57536	2.52923	-0.17762	-0.16043	-0.25707
8	-0.18141	0.148765	3.15469	71.0717	76.6439	71.7311	-0.68378	-0.65457	-0.1523	8.5419	5.71646	4.81798	5.73228	5.51381	5.31553	-0.46827	-0.56574	-0.65511
4	64.2897	59.8631	63.9858	94.432	95.5668	90.3546	-0.85124	-1.0116	-0.41337	59.5996	50.9077	56.8621	50.4925	49.2865	53.2797	-0.56515	-0.66706	-0.75462
2	69.6483	72.3594	69.1203	97.7812	99.762	93.8357	-1.52107	-1.9042	-0.76148	79.8482	75.0232	73.1819	90.6023	92.6539	89.5016	-1.24334	1.05548	-1.35169
1	76.1792	78.1613	76.2564	96.609	97.0842	93.5746	-0.68378	-1.27938	-0.76148	85.7581	81.2041	82.8344	94.0901	95.2884	94.2781	1.27563	3.28464	0.339995
0.5	83.631	87.8012	88.5271	93.0087	97.4412	94.6189	76.2629	73.252	74.3419	90.6023	87.7903	89.5016	94.2839	95.5923	94.2781	59.8902	64.1814	54.5733
0.25	95.3531	95.0312	95.4021	97.1951	98.3338	94.88	82.4588	87.0872	81.9131	96.1247	95.491	96.1688	95.5434	95.8963	94.9747	79.6544	81.9134	77.6598
0.125	98.1161	99.6727	97.6648	97.9487	99.1372	97.8389	91.8364	95.3883	88.7882	98.6436	98.8348	98.0595	96.2215	96.6056	96.4674	91.9587	96.6056	91.4918

## Sheet: Fig S5
USA300 LAC
% Growth (OD600)
	DJK5			Vancomycin			Polymyxin B
Concentration (ug/ml)	BR1	BR2	BR3	BR1	BR2	BR3	BR1	BR2	BR3
64	80.3625	73.9054	54.8279	63.142	71.2785	67.4223	205.438	113.835	119.815
32	46.8278	58.1436	51.3014	75.8308	77.5832	87.5735	286.103	195.272	188.833
16	38.6707	64.4483	52.8128	110.272	91.7688	90.0924	120.242	95.972	89.5886
8	153.776	126.445	107.221	103.021	98.0736	110.243	103.021	95.4466	88.0773
4	148.338	112.785	101.679	111.178	102.802	94.6264	94.8641	86.5149	79.513
2	132.93	119.615	99.6642	102.115	91.7688	91.6037	103.021	91.2434	87.5735
1	126.586	114.886	95.1301	116.616	88.0911	89.5886	105.74	92.2942	88.581
0.5	122.961	98.599	91.6037	106.647	87.5657	86.0621	85.8006	84.9387	87.0697
0.25	111.178	109.107	93.115	99.3958	90.1926	81.5281	91.2387	98.599	88.581
PAO1
% Growth (OD600)
	DJK5			Vancomycin			Polymyxin B
Concentration (ug/ml)	BR1	BR2	BR3	BR1	BR2	BR3	BR1	BR2	BR3
64	3.90612	2.66582	6.35294	29.1754	26.087	17.4588	3.71323	3.42748	2.96471
32	2.74875	2.09457	2.11765	31.9723	33.3227	29.1294	2.07362	1.80895	1.27059
16	59.3635	35.0365	56.9882	34.48	38.8448	34.2118	1.30204	1.61853	0.894118
8	84.2469	72.6436	80.4235	61.6782	55.7918	61.9765	11.5255	2.66582	1.36471
4	84.2469	77.404	80.0471	95.6277	99.2066	91.1529	46.9217	63.8845	49.6471
2	91.0947	78.5465	81.3647	105.755	98.8258	97.5529	77.9778	82.1644	71.2941
1	89.648	71.5011	85.2235	105.465	101.587	98.8706	79.7139	76.5471	73.7412
0.5	89.3586	82.45	84	104.308	95.9695	100	83.0895	83.4973	80.5177
0.25	90.8053	80.165	83.7177	104.501	98.4449	96.0471	91.0947	88.7337	85.9765
